# Supplementary material for: Transcriptional responses in a mouse model of silicone wire embolization induced acute retinal artery ischemia and reperfusion
Source: eLife. 2024 Oct 9;13:RP98949. doi: 10.7554/eLife.98949 (PMC11464005; doi:10.7554/eLife.98949)
Supplement: Supplementary file 1. — Time course of all the morphological, functional, cellular, and transcriptome changes in the UPOAO model.-: no change; ↑: increase; ↓: decrease; /: not involved in the article; #: supplementary content: also increase after 60 min-ischemia and 1d-reperfusion. [file elife-98949-supp1.docx]

**Table. S2 Summary table:** Time course of all the morphological, functional, cellular, and transcriptome changes in the UPOAO model.

| Changes in each group | | | 30min-3d | 30min-7d | 60min-0d | 60min-3d | | | 60min-7d | | |
| --- | --- | --- | --- | --- | --- | --- | --- | --- | --- | --- | --- |
| RGCs counts | | | - | - | / | ↓ | | | ↓ | | |
| ERG | Amplitudes of a-waves | | - | - | / | - | | | - (0.001, 0.003, 0.01, 0.03, 0.1, 1.0 cd.s/m2)  ↓ (0.3, 3.0, 10.0 cd.s/m2) | | |
|  | Response time of a-waves | | - | - | - | | | - | | |
|  | Amplitudes of b-waves | | - | - | ↓ | | | ↓ | | |
|  | Response time of b-waves | | - | - | - | | | - | | |
|  | Amplitudes of OPs-waves | | / | | | ↓ | | | ↓ | | |
| OCT |  | | / | | | 1.5 PD | 3 PD | 4.5PD | 1.5 PD | 3 PD | 4.5PD |
| GCC thickness | | - | - | - | ↓ | ↓ | ↓ |
| INL+OPL thickness | | - | - | - | - | - | - |
| ONL+IS/OS+RPE thickness | | - | - | - | - | - | - |
| total retinal thickness | | - | - | ↓ | ↓ | ↓ | ↓ |
| HE | RNFL+GCL thickness | | / | | | ↑ | | | ↓ | | |
| IPL thickness | | ↓ | | | ↓ | | |
| INL thickness | | - | | | ↓ | | |
| OPL thickness | | - | | | - | | |
| ONL thickness | | - | | | - | | |
| IS/OS+RPE thickness | | - | | | - | | |
| Immunofluorescence density of retinal neural cells | Bipolar cells (PKCα) | | / | | | - | | | ↓ | | |
| Horizontal cells (Calbindin) | | ↓ | | | ↓ | | |
| Cholinergic amacrine cells (ChAT) | | ↓ | | | ↓ | | |
| Photoreceptor cells (Recoverin) | | - | | | - | | |
| Peripheral leukocyte infiltration (CD45) # | | | / | | | ↑ | | | ↑ | | |
| Microglia counts (Iba1) | | | / | | | ↑ | | | ↑ | | |
| RNA-seq | | DEGs number | / | | 419 (up: 215; down: 204) | 542 (up: 372; down: 170) | | | 739 (up: 429; down: 310) | | |
| Enrichment | Immune cells migration-related pathways | Oxidative stress-related pathways | | | Immune inflammation-related pathways | | |

-: no change;

↑: increase;

↓: decrease;

/: not involved in the article;

#: supplementary content: also increase after 60min-ischemia and 1d-reperfusion;
